# Supplementary material
Source: PubMed Central journal article supplement (PMC4665800)
Supplement: JCI82204.sd.pdf [file JCI82204.sd.pdf]

**Mitochondrial metabolism mediates oxidative stress and inflammation in fatty liver**

Santhosh Satapati<sup>1</sup>, Blanka Kucejova<sup>1</sup>, Joao A. G. Duarte<sup>1</sup>, Justin A. Fletcher<sup>1</sup>, Lacy Reynolds<sup>1</sup>, Nishanth E. Sunny<sup>1</sup>, Tianteng He<sup>1</sup>, Arya Nair<sup>1</sup>, Kenneth Livingston<sup>1</sup>, Xiaorong Fu<sup>1</sup>, Matthew E. Merritt<sup>1</sup>, A. Dean Sherry<sup>1</sup>, Craig R. Malloy<sup>12</sup>, John M. Shelton<sup>3</sup>, Jennifer Lambert<sup>2</sup>, Elizabeth J. Parks<sup>5</sup>, Ian Corbin<sup>1</sup>, Mark A. Magnuson<sup>6</sup>, Jeffrey D. Browning<sup>12</sup>, and Shawn C. Burgess<sup>14</sup>

<sup>1</sup>AIRC Division of Metabolic Mechanisms of Disease, <sup>2</sup> Department of Internal Medicine, <sup>3</sup>Department of Pathology and <sup>4</sup>Department of Pharmacology, The University of Texas Southwestern Medical Center, Dallas, Tx, USA, <sup>5</sup> Department of Nutrition, University of Missouri, Columbia, Mo, <sup>6</sup>Department of Molecular Physiology and Biophysics, Vanderbilt University School of Medicine, Nashville, TN

## Supplemental Data

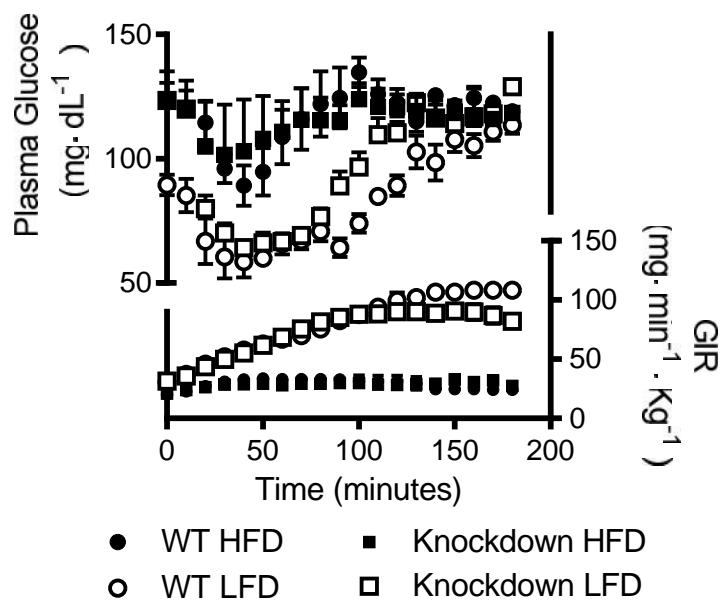

**Supplemental Figure 1.** Plasma glucose levels and rates of glucose infusion during hyperinsulinemic euglycemic clamps.

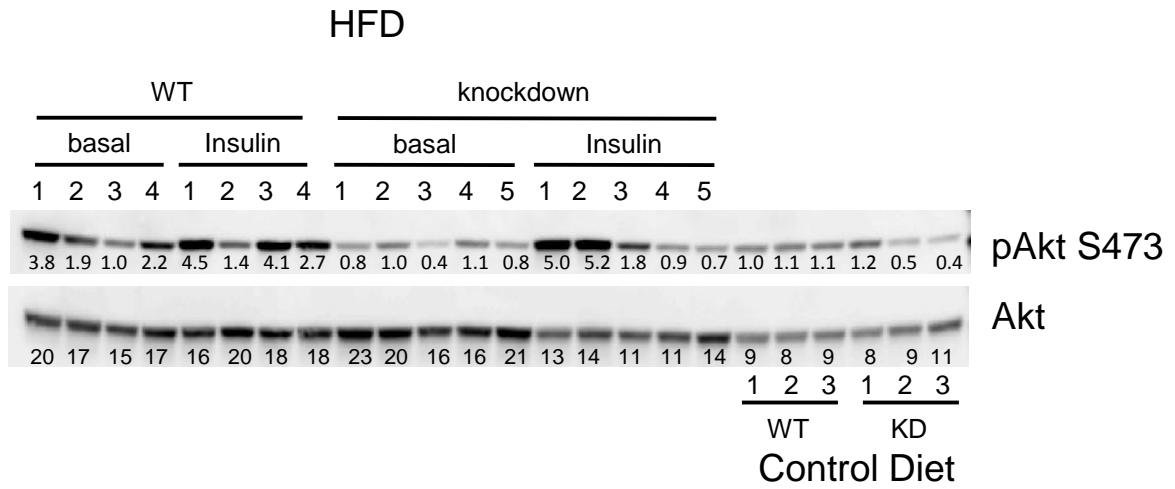

**Supplemental Figure 2.** Insulin signaling in HFD mice before and 3 minutes after portal vein insulin injection. Akt and pAkt Western blots shown with quantification below individual bands were used to calculate Akt signaling shown in Figure 4.

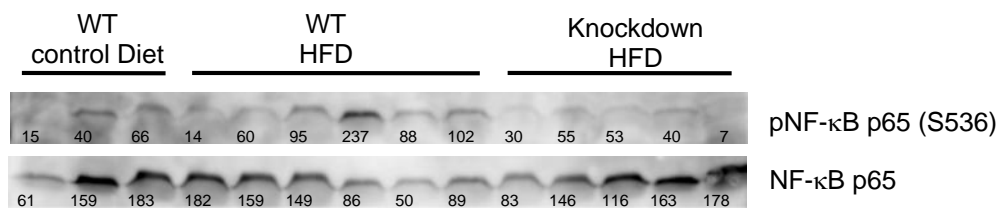

**Supplemental Figure 3.** Western blot of NF-κB phosphorylation. Quantification below individual bands were used to calculate pNF-κB/ NF-κB signaling shown in Figure 6.

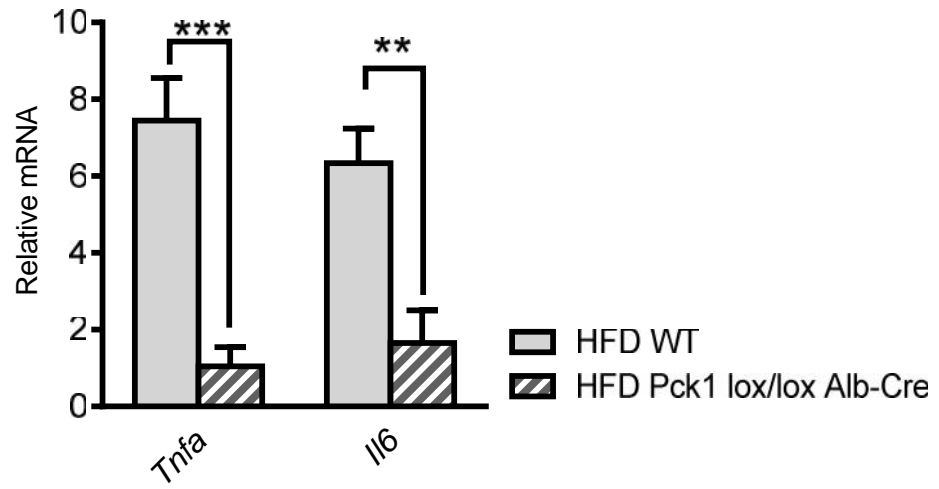

**Supplemental Figure 4.** Inflammatory gene expression was decreased in liver specific knockout mice on a HFD.

**Supplemental Table 1.** Organic acid concentration (nmol•g<sup>-1</sup> liver) of snap frozen liver determined by GC-MS (n=3-4 control diet or n=6-9 HFD, mean ± SEM).

|               | Citrate    | aKG         | Succinate | Fumarate   | Malate     | Oxaloacetate | Pyr        | Lac        |
|---------------|------------|-------------|-----------|------------|------------|--------------|------------|------------|
| WT            | 404 ±30    | 30.2 ±3.0   | 437 ±52   | 70.6 ±8.4  | 123 ±21    | 1.4 ±0.2     | 104 ±18.5  | 532 ±42    |
| Knockdown     | 724* ±46   | 70.1* ±25.7 | 377* ±61  | 378* ±61.8 | 667* ±93   | 4.7* ±0.5    | 85.3 ±15.4 | 623 ±140   |
| WT HFD        | 543 ±58    | 54.1 ±8.7   | 186 ±15   | 148 ±10.7  | 742 ±74    | 7.7 ±1.0     | 141 ±15.6  | 1134 ±178  |
| Knockdown HFD | 1150* ±348 | 44.4 ±5.3   | 278* ±29  | 691* ±52.7 | 2676* ±177 | 42.8* ±2.5   | 63.4* ±4.3 | 798.0* ±72 |

\*Different from WT by t-test (p<0.05)

**Supplemental Table 2.** Data used to calculate oxygen consumption in human studies from Sunny et al. Cell Metab. 2011;14(6):804-10, according to equations given in the methods section.

| Subject | TCA Cycle Flux | Ketogenesis (BHB turnover) | GNG From TCA Cycle | GNG From Glycerol | Calculated O <sub>2</sub> Consumption | NAS | Ishak |
|---------|----------------|----------------------------|--------------------|-------------------|---------------------------------------|-----|-------|
|         | 5.75 NADH      | 2.5 NADH                   | -0.1 NADH          | 1 NADH            | ½ total NADH                          |     |       |
| 1       | 0.40           | 0.03                       | 0.53               | 0.19              | 1.26                                  | 0   | 0     |
| 2       | 0.61           | 0.14                       | 0.63               | 0.16              | 1.99                                  | 3   | 2     |
| 3       | 0.54           | 0.16                       | 0.63               | 0.15              | 1.80                                  | 2   | 3     |
| 4       | 0.64           | 0.17                       | 0.62               | 0.20              | 2.12                                  | 4   | 4     |
| 5       | 1.28           | 0.07                       | 0.54               | 0.29              | 3.89                                  | 4   | 3     |
| 6       | 1.04           | 0.08                       | 0.67               | 0.15              | 3.12                                  | 6   | 10    |
| 7       | 0.62           | 0.08                       | 0.63               | 0.19              | 1.94                                  | 1   | 1     |
| 8       | 1.16           | 0.09                       | 0.92               | 0.09              | 3.44                                  | 6   | 7     |

Flux reported in mmol•min<sup>-1</sup>. The highlighted area is the data used in the manuscript
